# Supplementary material for: Novel Short-Chain Quinones to Treat Vision Loss in a Rat Model of Diabetic Retinopathy
Source: MDPI journal article supplement (doi:10.3390/ijms22031016), 2021-01-20
Supplement: s1 [file s1]

## Supplementary Data

**Table S1: List of primary and secondary antibodies used for immunohistology**

| <b>Product name/Catalogue no.</b>             | <b>Company</b>                                               | <b>Dilution</b> | <b>Reference no./Notes</b> |
|-----------------------------------------------|--------------------------------------------------------------|-----------------|----------------------------|
| Mouse-anti-Brn-3a, (MAB 1585)                 | Merck Millipore (EMD Millipore), Bayswater, VIC, Australia   | 1:200           | Lot: 2943286               |
| Donkey-anti-mouse-Alexa Fluor 488, (ab150105) | Abcam, Melbourne, VIC, Australia                             | 1:1000          | Order no: 3288156          |
| Rabbit-anti-Albumin, (GTX102419)              | Sapphire Bioscience (GeneTex Inc), Redfern, NSW, Australia   | 1:500           | Lot: 42312                 |
| Tomato Lectin, (DL-1177)                      | Abacus DX (Vector Laboratories), Meadowbrook, QLD, Australia | 1:1000          |                            |
| Goat-anti-GFAP, (ab53554)                     | Abcam, Melbourne, VIC, Australia                             | 1:500           | Lot: GR295831-2            |
| Donkey-Anti-Goat-Alexa Fluor 568, (A11057)    | ThermoFisher Scientific, Scoresby, VIC, Australia            | 1:1000          | Lot: 1711491               |
| Mouse-anti-3-nitro-tyrosine, (ab61392)        | Abcam, Melbourne, VIC, Australia                             | 1:1000          | Clone no: 39B6             |

**Table S2: Total eyes per treatment group used for immunohistochemistry**

| <b>Test Compounds</b> | <b>RGC count (n)</b> | <b>Retinal thickness (n)</b> | <b>Reactive Gliosis (n)</b> | <b>Vascular leakage (n)</b> | <b>Oxidative damage (n)</b> |
|-----------------------|----------------------|------------------------------|-----------------------------|-----------------------------|-----------------------------|
| Control               | 12                   | 12                           | 6                           | 5                           | 5                           |
| Vehicle               | 7                    | 7                            | 6                           | 5                           | 5                           |
| Idebenone             | 8                    | 8                            | 6                           | 5                           | 5                           |
| Elamipretide          | 6                    | 6                            | 6                           | 5                           | 5                           |
| #77                   | 6                    | 6                            | 6                           | 5                           | 5                           |
| #37                   | 6                    | 6                            | 6                           | 5                           | 5                           |

**Table S3: Animals included in behavioural study over a 21-week period\***

| <b>Treatment</b>       | <b>Up to Week 18</b> | <b>Up to Week 21</b> | <b>Total animal numbers</b> |
|------------------------|----------------------|----------------------|-----------------------------|
| <b>Healthy control</b> | 0                    | 6                    | 6                           |
| <b>Vehicle</b>         | 1                    | 10                   | 11                          |
| <b>Idebenone</b>       | 3                    | 8                    | 11                          |
| <b>Elamipretide</b>    | 0                    | 8                    | 8                           |
| <b>#77</b>             | 0                    | 9                    | 9                           |
| <b>#37</b>             | 0                    | 10                   | 10                          |
| <b>Total</b>           | 4                    | 51                   | <b>55</b>                   |

\* Only the animals that were used for the analysis are listed in the table. 19 animals were culled prematurely (before the start of the treatment) due to ethical reasons, because of poor health. These animals are not listed in the table and were not used for the analysis. Those culled in week 18 were included in the analysis.

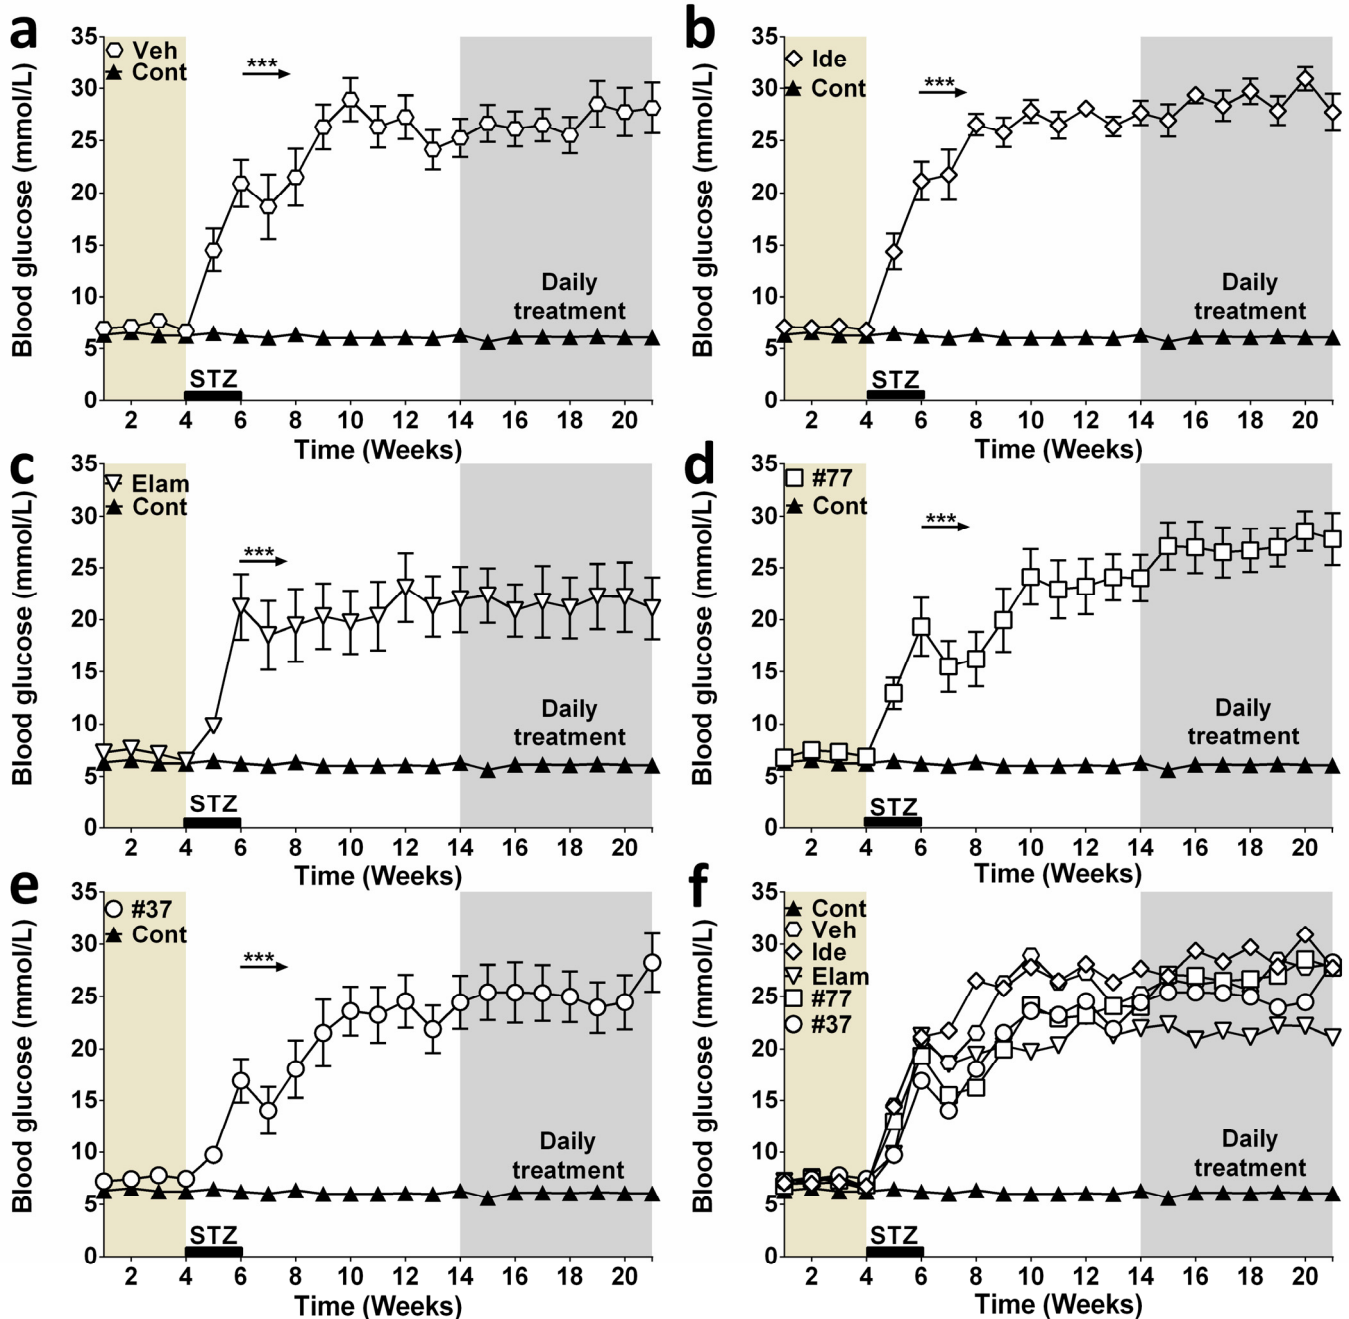

**Figure S1: Effect of STZ on blood glucose levels**

STZ (125mg/kg) was administered over a period of 2 weeks (starting from week 4) via osmotic pumps. (a-e) show the average weekly blood glucose level measurement for all five treatment groups of Long Evans rats when compared against the healthy non-diabetic group (control). (f) represent a pool of all data together. Data is expressed as mean (n = 8-11 rats/group, see Table S3 for detail) Error bar = SEM,  $p^{***} < 0.001$ , using two-way ANOVA measures. Brown area: baseline observation period (weeks 1-4), grey area: treatment period. Error bars were omitted from (f) for clarity.
